# Supplementary material for: The Antigenic Membrane Protein (Amp) of Rice Orange Leaf Phytoplasma Suppresses Host Defenses and Is Involved in Pathogenicity
Source: MDPI journal article supplement (doi:10.3390/ijms24054494), 2023-02-24
Supplement: s1 [file s1]

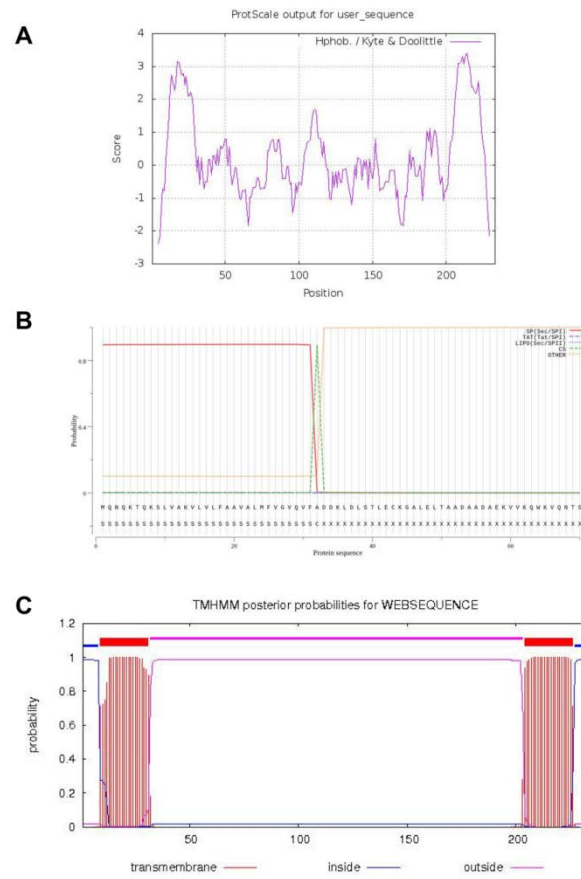

Figure S1: Analysis of ROLP-Amp. (A) Amp Hydrophilic Analysis; (B) Prediction of ROLP-Amp protein signal peptide cleavage site; (C) Prediction of transmembrane domain of ROLP-Amp
