# Supplementary material for: The Antigenic Membrane Protein (Amp) of Rice Orange Leaf Phytoplasma Suppresses Host Defenses and Is Involved in Pathogenicity
Source: MDPI journal article supplement (doi:10.3390/ijms24054494), 2023-02-24
Supplement: s1 [file s1]

**Table S1.** Primers used in this study

| Primer Name                  | Sequence (5'-3')                                           |
|------------------------------|------------------------------------------------------------|
| Amp-F                        | ATGGATGATAAACTAGATTTAAGCAC                                 |
| Amp-R                        | TTATTTATTGTTTTTGTTTTTTTAAC                                 |
| 1355CF                       | GCAAAAGCACTTGCAGGAGAG                                      |
| 1355CR                       | GCTTGTC TTGCTTTTATGTCGG                                    |
| qOsEF1a-F                    | ACATTGCCGTCAAGTTTGCTG                                      |
| qOsEF1a-R                    | ACATTGCCGTCAAGTTTGCTG                                      |
| Actin-F                      | CATCAGGGTGTTCATGGTGGG                                      |
| Actin-R                      | GGTCTCAAACATGATCTGGGTCA                                    |
| qAmp-F                       | CCAGCTTCTGCATCTACTTTGC                                     |
| qAmp-R                       | GTAGTGGTTGCTGATAATAAAGTAAC                                 |
| NusA-F                       | GCATTTCTGGCGAACGTACCA                                      |
| NusA-R                       | CAACTTGAAGGAATGAAGCAGG                                     |
| pGADT7-Amp-F                 | <u>GCCATGGAGGCCAGTGAATTC</u> GATGATAAACTAGATTTAAGCAC       |
| pGADT7-Amp-R                 | <u>ACGATTCATCTGCAGCTCGAGTTATTTATTGTTTTTGTTTTTTTA</u><br>AC |
| pGBKT7-Actin( <i>R.d</i> )-F | <u>ATGGCCATGGAGGCCGAATTC</u> ATGTGTGACGACGAAGTAGC          |
| pGBKT7-Actin( <i>R.d</i> )-R | <u>CCGCTGCAGGTCGACGGATCCCTTAGAAGCAATTCCTGTGCAC</u>         |
| pGBKT7-Actin( <i>N.c</i> )-F | <u>ATGGCCATGGAGGCCGAATTC</u> ATGTGTGACGACGAAGTTGCT         |
| pGBKT7-Actin( <i>N.c</i> )-R | <u>CCGCTGCAGGTCGACGGATCCCTTAGAAGCACTTCCTGTGCAC</u>         |
| pGBKT7-Actin( <i>N.l</i> )-F | <u>ATGGCCATGGAGGCCGAATTC</u> ATGTGTGACGAAGAAGTAGCC         |
| pGBKT7-Actin( <i>N.l</i> )-R | <u>CCGCTGCAGGTCGACGGATCCCTTAGAAGCACTTCCTGTGGAC</u>         |
| pMBP-Amp-F                   | <u>TATCGGAATTAATTCGGATCCG</u> GATGATAAACTAGATTTAAGCA<br>C  |
| pMBP-Amp-R                   | <u>GTGGTGGTGGTGGTGCTCGAGTTATTTATTGTTTTTGTTTTTTT</u><br>AAC |

---

|                             |                                                            |
|-----------------------------|------------------------------------------------------------|
| pGEXT-Actin( <i>R.d</i> )-F | <u>CCGCGTGGATCCCCGGAATTC</u> ATGTGTGACGACGACGTA            |
| pGEXT-Actin( <i>R.d</i> )-R | <u>GTCACGATGCGGCCGCTCGAGT</u> TAGAAGCATTTCCTGTGGAC         |
| pGEXT-Actin( <i>N.c</i> )-F | <u>CCGCGTGGATCCCCGGAATTC</u> ATGTGTGACGACGAAGTTGCT         |
| pGEXT-Actin( <i>N.c</i> )-R | <u>GTCACGATGCGGCCGCTCGAGT</u> TAGAAGCACTTCCTGTGCAC         |
| pEF28a(+)-Amp-F             | <u>CAGCAAATGGGTCGCGGATCCGAT</u> GATAAACTAGATTTA            |
| pEF28a(+)-Amp-R             | <u>GCAAGCTTGTCGACGGAGCTCGAT</u> GTTTTGTACCAAGGTGTTT        |
| qOsPR1-F                    | CAGGTGGTGTGGAGCAACTC                                       |
| qOsPR1-R                    | GTACGTAGTCCTCCTGCAGC                                       |
| qOsNPR1-F                   | TGGACAGGTTATCACCATTGGT                                     |
| qOsNPR1-R                   | CCGCAGCTTCCATTCCTATG                                       |
| qOsPAD4-F                   | GCCAGCTCCCCTACGACTTC                                       |
| qOsPAD4-R                   | CGTGTGCGGTGTAGGTTGTT                                       |
| qOsACS2-F                   | CACCCCGAGGCAYCCAT                                          |
| qOsACS2-R                   | ATTGGCGATCCTCTTGAAGTG                                      |
| seq-T7-F                    | TAATACGACTCACTATAGGGC                                      |
| seq-M13-F                   | GTTGTAAAACGACGGCCAG                                        |
| seq-GST-F                   | GGGCTGGCAAGCCACGTTTGGTG                                    |
| seq-pMBP-F                  | ACTGATGAAGGTCTGGAAGCGG                                     |
| PP2A-F                      | GACCCTGATGTTGATGTTTCGCT                                    |
| PP2A-R                      | GAGGGATTTGAAGAGAGATTTC                                     |
| PVX-Amp-F                   | <u>TCAGCACCAGCTAGCATCGATATGGATGATAAACTAG</u><br>ATTTAAGCAC |
| PVX-Amp-R                   | <u>AACCGTTCATCGGCGGTCGACTT</u> ATTATTGTTTTTGT<br>TTTTTTAAC |
| qPVX-CP-F                   | AAGCCTGAGCACAAATTCGC                                       |
| qPVX-CP-R                   | GCTTCAGACGGTGGCCG                                          |

---

---

|                    |                         |
|--------------------|-------------------------|
| qAtRBOHD-F         | CTCATTGCCATGCTTCAGTC    |
| qAtRBOHD-R         | GTACATAACGAGATTAACGGTCG |
| qAtCAT2-F          | TCAAGGAAGAAGGAGCTTTCA   |
| qAtCAT2-R          | CATCATGTGGATCTTCTGTGC   |
| qAtEF1 $\alpha$ -F | CAGGCTGATTGTGCTGTTCTTA  |
| qAtEF1 $\alpha$ -R | GTTGTATCCGACCTTCTTCAGG  |
| qAtPEN3-F          | GTTGAATGAGCTTGCGAGG     |
| qAtPEN3-R          | TCAGTGACGAGACTGTTCT     |

---

Notes: Homologous sequences are underlined.
