# Supplementary figures and images for: The Antigenic Membrane Protein (Amp) of Rice Orange Leaf Phytoplasma Suppresses Host Defenses and Is Involved in Pathogenicity
Source: MDPI journal article supplement (doi:10.3390/ijms24054494), 2023-02-24

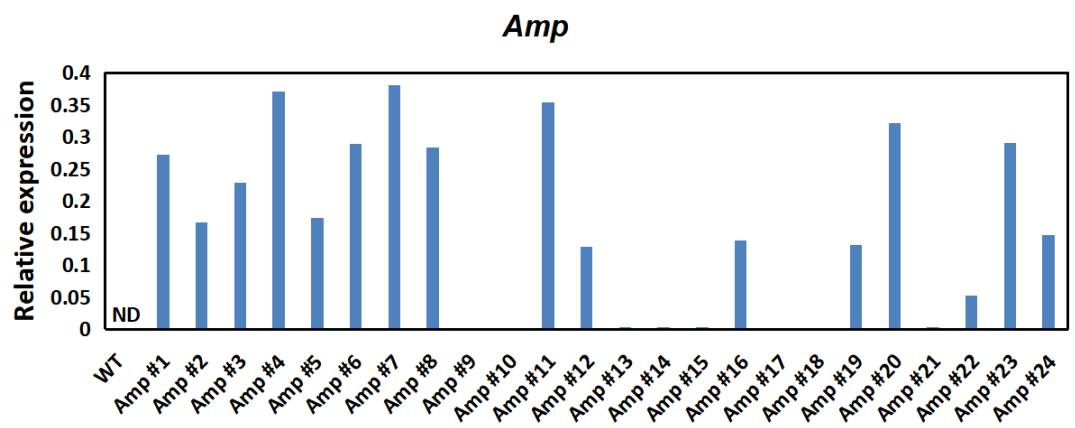

Figure S2: Relative expression of Amp-OE transgenic rice T0 lines.

Supplement: s1 [file s1]
